# Supplementary material for: Hybrid Spreading Mechanisms and T Cell Activation Shape the Dynamics of HIV-1 Infection
Source: PubMed Central journal article supplement (PMC4383537; doi:10.1371/journal.pcbi.1004179), 2015-04-02
Supplement: pcbi.1004179.s001.pdf [file pcbi.1004179.s001.pdf]

| Patient | $Q_0$ (cells/ $\mu$ l) | $S_0$ (cells/ $\mu$ l) | $N_M$ (cells/ $\mu$ l) | $\kappa$ (day $^{-1}$ ) | $D$ (days) |
|---------|------------------------|------------------------|------------------------|-------------------------|------------|
| MM1     | 879                    | 21                     | 996                    | 1.753604                | 30         |
| MM4     | 684                    | 16                     | 773                    | 1.474027                | 33         |
| MM8     | 392                    | 9                      | 439                    | 1.076508                | 49         |
| MM9     | 440                    | 10                     | 494                    | 1.349088                | 61         |
| MM12    | 542                    | 13                     | 611                    | 1.982885                | 72         |
| MM13    | 537                    | 13                     | 605                    | 1.250311                | 31         |
| MM23    | 419                    | 10                     | 470                    | 1.150800                | 51         |
| MM24    | 547                    | 13                     | 617                    | 1.494605                | 54         |
| MM27    | 606                    | 14                     | 684                    | 1.353939                | 30         |
| MM33    | 781                    | 18                     | 884                    | 1.623077                | 33         |
| MM39    | 553                    | 13                     | 623                    | 1.276949                | 32         |
| MM40    | 435                    | 10                     | 488                    | 1.137114                | 46         |
| MM42    | 641                    | 15                     | 724                    | 1.801382                | 57         |
| MM43    | 582                    | 14                     | 656                    | 2.511129                | 80         |
| MM45    | 542                    | 13                     | 611                    | 1.273904                | 33         |
| MM57    | 406                    | 9                      | 455                    | 1.207627                | 58         |
| MM60    | 587                    | 14                     | 662                    | 1.325221                | 33         |
