# Supplementary material for: Hybrid Spreading Mechanisms and T Cell Activation Shape the Dynamics of HIV-1 Infection
Source: PubMed Central journal article supplement (PMC4383537; doi:10.1371/journal.pcbi.1004179), 2015-04-02
Supplement: pcbi.1004179.s002.pdf [file pcbi.1004179.s002.pdf]

| Patient | $N_s$ (cells/ $\mu$ l) |       | $\log_{10}V_s$ (virions/ $\mu$ l) |       | $t_A$ (days) |       |
|---------|------------------------|-------|-----------------------------------|-------|--------------|-------|
|         | Data                   | Model | Data                              | Model | Data         | Model |
| MM1     | 851                    | 829   | 1.63                              | 1.45  | >3317        | 3342  |
| MM4     | 663                    | 646   | 1.11                              | 1.38  | >1567        | 1612  |
| MM8     | 367                    | 354   | 1.36                              | 1.41  | 846          | 978   |
| MM9     | 368                    | 359   | 1.64                              | 1.64  | 895          | 1101  |
| MM12    | 386                    | 377   | 1.84                              | 1.86  | 935          | 931   |
| MM13    | 545                    | 510   | 0.90                              | 1.30  | >1151        | 1162  |
| MM23    | 381                    | 374   | 1.68                              | 1.45  | 1554         | 1574  |
| MM24    | 462                    | 453   | 1.72                              | 1.69  | >1093        | 1152  |
| MM27    | 610                    | 579   | 1.15                              | 1.30  | 1389         | 1389  |
| MM33    | 745                    | 729   | 1.51                              | 1.46  | >2051        | 2061  |
| MM39    | 558                    | 526   | 1.08                              | 1.30  | 1226         | 1286  |
| MM40    | 408                    | 400   | 1.26                              | 1.36  | >1550        | 1572  |
| MM42    | 508                    | 499   | 1.78                              | 1.81  | >966         | 1022  |
| MM43    | 367                    | 347   | 2.12                              | 1.98  | >787         | 786   |
| MM45    | 543                    | 521   | 0.30                              | 1.23  | >3068        | 3217  |
| MM57    | 352                    | 346   | 1.52                              | 1.56  | >1240        | 1387  |
| MM60    | 582                    | 554   | 0.60                              | 1.36  | >1140        | 1149  |
